# Supplementary material
Source: publisher figshare collection journal article supplement (https://frontiersin.figshare.com/ndownloader/files/27921489)
Supplement: Supplementary file [file 27921489]

Supplementary Table 1 Matched characteristics of included studies

| Study             | Matched characteristics                                                                                                     |
|-------------------|-----------------------------------------------------------------------------------------------------------------------------|
| Belli et al.      | age, sex, ASA score, liver function, tumor size, tumor location and type of resection                                       |
| Truant et al.     | tumor size, tumor number and type of resection                                                                              |
| Memeo et al.      | liver function, underlying liver disease, AFP, tumor size, tumor number, type of resection and pathological characteristics |
| Komatsu et al.    | age, sex, BMI, ASA score, liver function, tumor size, tumor number and operative procedure                                  |
| Jiang et al.      | age, sex, BMI, ASA score, underlying liver disease, liver function, tumor location and type of resection.                   |
| Cheung et al.     | NA                                                                                                                          |
| Xu et al.         | age, sex, BMI, ASA score, comorbidities, liver function, previous abdominal surgery history, tumor size and tumor location  |
| Kim et al.        | age, BMI, liver function, tumor size, tumor location, tumor number and presence of microvascular invasion                   |
| Sandro et al.     | age, ECOG performance status, liver function, AFP, tumor size, tumor number and type of resection                           |
| Delvecchio et al. | sex, ASA score, comorbidities, liver function, tumor size and tumor number                                                  |
| Fu et al.         | age, liver function, tumor size, tumor location, tumor capsule, tumor differentiation, and resection type                   |
| Inoue et al.      | age, sex, BMI, ASA score, underlying liver disease, liver function, tumor size, tumour location and tumor number            |
| Cheung et al.     | age, sex, comorbidities, underlying liver disease, liver function, tumor size, tumor number and tumor stage                 |
| Hobeika et al.    | ASA score, liver function, type of resection and difficulty grade                                                           |
| Yamamoto et al.   | tumor size, tumor number and difficulty grade                                                                               |
| Yoon et al.       | age, sex, ASA score, comorbidities, liver function, AFP and history of upper abdominal surgery                              |

ASA American Society of Anesthesiologists, BMI body mass index, ECOG Eastern Cooperative Oncology Group, AFP a-fetoprotein, NA not available.

Supplementary Table 2 Surgical techniques of included studies

| Study          | Inflow occlusion method                     |                | Parenchymal transection technique           |                                         | Hemostasis method                     |                                                                                |
|----------------|---------------------------------------------|----------------|---------------------------------------------|-----------------------------------------|---------------------------------------|--------------------------------------------------------------------------------|
|                | L                                           | O              | L                                           | O                                       | L                                     | O                                                                              |
| Belli et al.   | PM when needed                              | PM when needed | Harmonic scalpel<br>or a Ligasure<br>device | Crushing forceps                        | Bipolar<br>electrocoagulation         | Bipolar<br>electrocoagulation                                                  |
| Truant et al.  | PM                                          | PM             | Harmonic scalpel                            | Harmonic scalpel<br>or crushing forceps | Bipolar<br>electrocoagulation         | Bipolar<br>electrocoagulation                                                  |
| Memeo et al.   | PM when needed                              | PM             | harmonic scalpel<br>and bipolar forceps     | Ultrasonic<br>dissector                 |                                       | Bipolar<br>electrocoagulation                                                  |
| Komatsu et al. | PM when needed                              | PM when needed | Ultrasonic<br>dissector                     | Ultrasonic<br>dissector                 | Bipolar<br>electrocoagulation         | Bipolar<br>electrocoagulation                                                  |
| Jiang et al.   | NA                                          | NA             | NA                                          | NA                                      | NA                                    | NA                                                                             |
| Cheung et al.  | Individual isolation of<br>the liver inflow | NA             | Ultrasonic<br>dissector and<br>CUSA         | CUSA                                    | Metal clips, diathermy<br>and sutures | Electrocautery,<br>argon beam, or<br>sutures                                   |
| Xu et al.      |                                             | PM             | Harmonic<br>scalpel,CUSA or<br>LigaSure     | CUSA or clamp<br>crushing               |                                       | Bipolar<br>electrocoagulation                                                  |
| Kim et al.     | PM                                          | PM             | CUSA and other<br>energy device             | CUSA and other<br>energy device         | Clips                                 | Monopolar<br>electrocoagulation,<br>argon beam, or<br>nonabsorbable<br>sutures |

|                   |                |                |                                                                   |                                                                   |                                              |                                                               |
|-------------------|----------------|----------------|-------------------------------------------------------------------|-------------------------------------------------------------------|----------------------------------------------|---------------------------------------------------------------|
| Sandro et al.     | NA             | NA             | Harmonic scalpel,CUSA or LigaSure                                 | NA                                                                | NA                                           | clips and monofilamentstiches                                 |
| Delvecchio et al. | PM             | PM             | Electrocoagulation, ultrasound, radiofrequency or combined energy | Electrocoagulation, ultrasound, radiofrequency or combined energy |                                              |                                                               |
| Fu et al.         | PM             | PM when needed | harmonic scalpel                                                  | harmonic scalpel                                                  | clips,bipolar electrocoagulation and sutures | Electrocoagulation or sutures                                 |
| Inoue et al.      | PM when needed | NA             | Ultrasonic dissector                                              | NA                                                                | Electrocautery, clips, or sutures.           | NA                                                            |
| Cheung et al.     | PM when needed | PM when needed | CUSA and other energy devices                                     | CUSA and other energy devices                                     | Electrocautery, argon beam or suturing       | Electrocautery, argon beam or suturing                        |
| Hobeika et al.    | NA             | NA             | NA                                                                | NA                                                                | NA                                           | NA                                                            |
| Yamamoto et al.   | PM             | PM             | Ultrasonic surgical aspirator and bipolar forceps                 | Ultrasonic surgical aspirator and bipolar forceps                 | NA                                           | NA                                                            |
| Yoon et al.       | PM when needed | PM when needed | Harmonic Scalpel, CUSA and other energy device                    | CUSA                                                              |                                              | Monopolar electrocoagulation, argon beam, clips, or suturing. |

CUSA Cavitron ultrasonic surgical aspirator, NA not available, PM Pringle maneuver.
